# Supplementary material
Source: PubMed Central journal article supplement (PMC6380942)
Supplement: NIHMS1008659-supplement-Supporting_Information.pdf [file NIHMS1008659-supplement-Supporting_Information.pdf]

# Consequences of the Endogenous *N*-Glycosylation of Human Ribonuclease 1

Valerie T. Ressler<sup>†,‡</sup> and Ronald T. Raines<sup>†,‡,||,\*</sup>

<sup>†</sup>Department of Chemistry and <sup>||</sup>Department of Biochemistry, University of Wisconsin–Madison, Madison, Wisconsin 53706, United States, and <sup>‡</sup>Department of Chemistry, Massachusetts Institute of Technology, Cambridge, Massachusetts 02139, United States

\*Telephone: (617) 253-1470. E-mail: rtraines@mit.edu.

| Content                                                                                             | Page  |
|-----------------------------------------------------------------------------------------------------|-------|
| Table of Contents                                                                                   | S1    |
| <b>Figure S1.</b> DNA sequences that encode the proteins used in this work                          | S2–S4 |
| <b>Figure S2.</b> Oligonucleotides used for site-directed mutagenesis                               | S4    |
| <b>Figure S3.</b> Amino acid sequences of the proteins used in this work                            | S5    |
| <b>Figure S4.</b> Zymogram of human RNase 1 glycoforms                                              | S6    |
| <b>Figure S5.</b> Representative MALDI–TOF mass spectra of human RNase 1 glycoforms                 | S6    |
| <b>Figure S6.</b> Deconvoluted ESI mass spectra of human RNase 1 glycoforms                         | S7    |
| <b>Figure S7.</b> SDS–PAGE gels showing phosphorylation of human RNase 1 by <i>P. pastoris</i>      | S8    |
| <b>Figure S8.</b> Native gel showing the cleavage of a double-stranded RNA<br>by RNase 1 glycoforms | S9    |
| <b>Figure S9.</b> Putative <i>N</i> -glycosylation sites in human ptRNases 1–8                      | S9    |
| References                                                                                          | S10   |

NNN (*P. pastoris*): ATGAGATTTTCCTTCAATTTTTACTGCTGTTTTATTTCGCAGCATCCTCC  
 NNQ (*P. pastoris*): ATGAGATTTTCCTTCAATTTTTACTGCTGTTTTATTTCGCAGCATCCTCC  
 NQN (*P. pastoris*): ATGAGATTTTCCTTCAATTTTTACTGCTGTTTTATTTCGCAGCATCCTCC  
 QNN (*P. pastoris*): ATGAGATTTTCCTTCAATTTTTACTGCTGTTTTATTTCGCAGCATCCTCC  
 NQQ (*P. pastoris*): ATGAGATTTTCCTTCAATTTTTACTGCTGTTTTATTTCGCAGCATCCTCC  
 QNQ (*P. pastoris*): ATGAGATTTTCCTTCAATTTTTACTGCTGTTTTATTTCGCAGCATCCTCC  
 QQN (*P. pastoris*): ATGAGATTTTCCTTCAATTTTTACTGCTGTTTTATTTCGCAGCATCCTCC  
 QQQ (*P. pastoris*): ATGAGATTTTCCTTCAATTTTTACTGCTGTTTTATTTCGCAGCATCCTCC  
 NNN (*E. coli*):  
 QQQ (*E. coli*):

NNN (*P. pastoris*): GCATTAGCT**AAG**GAGAGTAGAGCTAAAAAGTTCCAACGTCAACATATG  
 NNQ (*P. pastoris*): GCATTAGCT**AAG**GAGAGTAGAGCTAAAAAGTTCCAACGTCAACATATG  
 NQN (*P. pastoris*): GCATTAGCT**AAG**GAGAGTAGAGCTAAAAAGTTCCAACGTCAACATATG  
 QNN (*P. pastoris*): GCATTAGCT**AAG**GAGAGTAGAGCTAAAAAGTTCCAACGTCAACATATG  
 NQQ (*P. pastoris*): GCATTAGCT**AAG**GAGAGTAGAGCTAAAAAGTTCCAACGTCAACATATG  
 QNQ (*P. pastoris*): GCATTAGCT**AAG**GAGAGTAGAGCTAAAAAGTTCCAACGTCAACATATG  
 QQN (*P. pastoris*): GCATTAGCT**AAG**GAGAGTAGAGCTAAAAAGTTCCAACGTCAACATATG  
 QQQ (*P. pastoris*): GCATTAGCT**AAG**GAGAGTAGAGCTAAAAAGTTCCAACGTCAACATATG  
 NNN (*E. coli*): **ATG**AAAGAATCTCGTGCTAAAAAATTCAGCGTCAGCATATG  
 QQQ (*E. coli*): **ATG**AAAGAATCTCGTGCTAAAAAATTCAGCGTCAGCATATG

NNN (*P. pastoris*): GATTCGGACTCCTCTCCATCTTCATCTTCCACATATTGTAATCAAATG  
 NNQ (*P. pastoris*): GATTCGGACTCCTCTCCATCTTCATCTTCCACATATTGTAATCAAATG  
 NQN (*P. pastoris*): GATTCGGACTCCTCTCCATCTTCATCTTCCACATATTGTAATCAAATG  
 QNN (*P. pastoris*): GATTCGGACTCCTCTCCATCTTCATCTTCCACATATTGTAATCAAATG  
 NQQ (*P. pastoris*): GATTCGGACTCCTCTCCATCTTCATCTTCCACATATTGTAATCAAATG  
 QNQ (*P. pastoris*): GATTCGGACTCCTCTCCATCTTCATCTTCCACATATTGTAATCAAATG  
 QQN (*P. pastoris*): GATTCGGACTCCTCTCCATCTTCATCTTCCACATATTGTAATCAAATG  
 QQQ (*P. pastoris*): GATTCGGACTCCTCTCCATCTTCATCTTCCACATATTGTAATCAAATG  
 NNN (*E. coli*): GACTCTGACTCTTCTCCGTCTTCTTCTTCTACTTACTGCAACCAGATG  
 QQQ (*E. coli*): GACTCTGACTCTTCTCCGTCTTCTTCTTCTACTTACTGCAACCAGATG

#### Aglycosylated Gln codons in red

NNN (*P. pastoris*): ATGAGAAGGAGAAATATGACCCAAGGTCGTTGTAAACCTGTTAATACG  
 NNQ (*P. pastoris*): ATGAGAAGGAGAAATATGACCCAAGGTCGTTGTAAACCTGTTAATACG  
 NQN (*P. pastoris*): ATGAGAAGGAGAAATATGACCCAAGGTCGTTGTAAACCTGTTAATACG  
 QNN (*P. pastoris*): ATGAGAAGGAGAG**cag**ATGACCCAAGGTCGTTGTAAACCTGTTAATACG  
 NQQ (*P. pastoris*): ATGAGAAGGAGAAATATGACCCAAGGTCGTTGTAAACCTGTTAATACG  
 QNQ (*P. pastoris*): ATGAGAAGGAGAG**cag**ATGACCCAAGGTCGTTGTAAACCTGTTAATACG  
 QQN (*P. pastoris*): ATGAGAAGGAGAG**cag**ATGACCCAAGGTCGTTGTAAACCTGTTAATACG  
 QQQ (*P. pastoris*): ATGAGAAGGAGAG**cag**ATGACCCAAGGTCGTTGTAAACCTGTTAATACG  
 NNN (*E. coli*): ATGCGTCGTCGTAACATGACTCAGGGTCGTTGCAAACCGGTTAACT  
 QQQ (*E. coli*): ATGCGTCGTCGT**caa**ATGACTCAGGGTCGTTGCAAACCGGTTAACT

NNN (*P. pastoris*): TTTGTGCACGAACCATTGGTGGACGTACAGAACGTTTGCTTCCAAGAG  
 NNQ (*P. pastoris*): TTTGTGCACGAACCATTGGTGGACGTACAGAACGTTTGCTTCCAAGAG  
 NQN (*P. pastoris*): TTTGTGCACGAACCATTGGTGGACGTACAGAACGTTTGCTTCCAAGAG  
 QNN (*P. pastoris*): TTTGTGCACGAACCATTGGTGGACGTACAGAACGTTTGCTTCCAAGAG  
 NQQ (*P. pastoris*): TTTGTGCACGAACCATTGGTGGACGTACAGAACGTTTGCTTCCAAGAG  
 QNQ (*P. pastoris*): TTTGTGCACGAACCATTGGTGGACGTACAGAACGTTTGCTTCCAAGAG  
 QQN (*P. pastoris*): TTTGTGCACGAACCATTGGTGGACGTACAGAACGTTTGCTTCCAAGAG  
 QQQ (*P. pastoris*): TTTGTGCACGAACCATTGGTGGACGTACAGAACGTTTGCTTCCAAGAG  
 NNN (*E. coli*): TTCGTTTCATGAACCGCTGGTTGACGTTTCAGAACGTTTGCTTCCAGGAA  
 QQQ (*E. coli*): TTCGTTTCATGAACCGCTGGTTGACGTTTCAGAACGTTTGCTTCCAGGAA

NNN (*P. pastoris*): AAAGTCACATGTAAAAATGGACAAGGTAATTGCTACAAGAGTAATTCC  
 NNQ (*P. pastoris*): AAAGTCACATGTAAAAATGGACAAGGTAATTGCTACAAGAGTAATTCC  
 NQN (*P. pastoris*): AAAGTCACATGTAAAAATGGACAAGGTAATTGCTACAAGAGT**ca**aTCC  
 QNN (*P. pastoris*): AAAGTCACATGTAAAAATGGACAAGGTAATTGCTACAAGAGTAATTCC  
 NQQ (*P. pastoris*): AAAGTCACATGTAAAAATGGACAAGGTAATTGCTACAAGAGT**ca**aTCC  
 QNQ (*P. pastoris*): AAAGTCACATGTAAAAATGGACAAGGTAATTGCTACAAGAGTAATTCC  
 QQN (*P. pastoris*): AAAGTCACATGTAAAAATGGACAAGGTAATTGCTACAAGAGT**ca**aTCC  
 QQQ (*P. pastoris*): AAAGTCACATGTAAAAATGGACAAGGTAATTGCTACAAGAGT**ca**aTCC  
 NNN (*E. coli*): AAAGTTACTTGCAAAAACGGTCAGGGTAACTGCTACAAATCTAACTCT  
 QQQ (*E. coli*): AAAGTTACTTGCAAAAACGGTCAGGGTAACTGCTACAAATCT**ca**gTCT

NNN (*P. pastoris*): TCAATGCATATCACAGACTGTTCGTCTGACTAATGGAAGCAGATACCCC  
 NNQ (*P. pastoris*): TCAATGCATATCACAGACTGTTCGTCTGACT**ca**gGGAAGCAGATACCCC  
 NQN (*P. pastoris*): TCAATGCATATCACAGACTGTTCGTCTGACTAATGGAAGCAGATACCCC  
 QNN (*P. pastoris*): TCAATGCATATCACAGACTGTTCGTCTGACTAATGGAAGCAGATACCCC  
 NQQ (*P. pastoris*): TCAATGCATATCACAGACTGTTCGTCTGACT**ca**gGGAAGCAGATACCCC  
 QNQ (*P. pastoris*): TCAATGCATATCACAGACTGTTCGTCTGACT**ca**gGGAAGCAGATACCCC  
 QQN (*P. pastoris*): TCAATGCATATCACAGACTGTTCGTCTGACTAATGGAAGCAGATACCCC  
 QQQ (*P. pastoris*): TCAATGCATATCACAGACTGTTCGTCTGACT**ca**gGGAAGCAGATACCCC  
 NNN (*E. coli*): TCTATGCATATCACTGACTGCCGTCTGACTAACGGTTCTCGTTACCCG  
 QQQ (*E. coli*): TCTATGCATATCACTGACTGCCGTCTGACT**ca**aGGTTCTCGTTACCCG

NNN (*P. pastoris*): AACTGTGCATACAGAACTTCTCCAAAGGAAAGGCACATTATCGTTGCT  
 NNQ (*P. pastoris*): AACTGTGCATACAGAACTTCTCCAAAGGAAAGGCACATTATCGTTGCT  
 NQN (*P. pastoris*): AACTGTGCATACAGAACTTCTCCAAAGGAAAGGCACATTATCGTTGCT  
 QNN (*P. pastoris*): AACTGTGCATACAGAACTTCTCCAAAGGAAAGGCACATTATCGTTGCT  
 NQQ (*P. pastoris*): AACTGTGCATACAGAACTTCTCCAAAGGAAAGGCACATTATCGTTGCT  
 QNQ (*P. pastoris*): AACTGTGCATACAGAACTTCTCCAAAGGAAAGGCACATTATCGTTGCT  
 QQN (*P. pastoris*): AACTGTGCATACAGAACTTCTCCAAAGGAAAGGCACATTATCGTTGCT  
 QQQ (*P. pastoris*): AACTGTGCATACAGAACTTCTCCAAAGGAAAGGCACATTATCGTTGCT  
 NNN (*E. coli*): AACTGCGCTTACCGTACTTCTCCGAAAGAACGTCATATCATCGTTGCT  
 QQQ (*E. coli*): AACTGCGCTTACCGTACTTCTCCGAAAGAACGTCATATCATCGTTGCT

NNN (*P. pastoris*): TGTGAGGGTTCACCTTATGTCCCTGTTTCATTTTGATGCCTCGGTGGAA  
 NNQ (*P. pastoris*): TGTGAGGGTTCACCTTATGTCCCTGTTTCATTTTGATGCCTCGGTGGAA  
 NQN (*P. pastoris*): TGTGAGGGTTCACCTTATGTCCCTGTTTCATTTTGATGCCTCGGTGGAA  
 QNN (*P. pastoris*): TGTGAGGGTTCACCTTATGTCCCTGTTTCATTTTGATGCCTCGGTGGAA  
 NQQ (*P. pastoris*): TGTGAGGGTTCACCTTATGTCCCTGTTTCATTTTGATGCCTCGGTGGAA  
 QNQ (*P. pastoris*): TGTGAGGGTTCACCTTATGTCCCTGTTTCATTTTGATGCCTCGGTGGAA  
 QQN (*P. pastoris*): TGTGAGGGTTCACCTTATGTCCCTGTTTCATTTTGATGCCTCGGTGGAA  
 QQQ (*P. pastoris*): TGTGAGGGTTCACCTTATGTCCCTGTTTCATTTTGATGCCTCGGTGGAA  
 NNN (*E. coli*): TCGGAAGGTTCTCCGTACGTTCCGGTTCATTTTCGACGCTTCTGTTGAA  
 QQQ (*E. coli*): TCGGAAGGTTCTCCGTACGTTCCGGTTCATTTTCGACGCTTCTGTTGAA  
  
 NNN (*P. pastoris*): GATAGCACT  
 NNQ (*P. pastoris*): GATAGCACT  
 NQN (*P. pastoris*): GATAGCACT  
 QNN (*P. pastoris*): GATAGCACT  
 NQQ (*P. pastoris*): GATAGCACT  
 QNQ (*P. pastoris*): GATAGCACT  
 QQN (*P. pastoris*): GATAGCACT  
 QQQ (*P. pastoris*): GATAGCACT  
 NNN (*E. coli*): GACTCTACT  
 QQQ (*E. coli*): GACTCTACT

**Figure S1.** DNA sequences that encode the proteins used in this work. DNA that encodes a leader sequence is in a gray box. The codon for the initial amino acid of each mature protein is in bold typeface.

| <b>Substitution</b> | <b>Forward (5'→3')</b>                                 | <b>Reverse (3'→5')</b>                                 |
|---------------------|--------------------------------------------------------|--------------------------------------------------------|
| Q34N                | GAGAA <u>AAT</u> ATGACCCAAGGTCGTTGTAAA                 | ACATTAGTTTACTACTCTTCTCT <b>TT</b> TACT                 |
| Q76N                | GAGT <u>AAT</u> TCCTCAATGCATATCACAGACTG                | CCTGTTCCATTAACGATGTTCTCA <b>TTA</b> AGG                |
| Q88N                | TCGTCTGACT <u>AAT</u> TGGAAGCAGATACCCCAA<br>CTGTGCATAC | GAGTTACGTATAGTGTCTGACAGCAGACTG<br><b>ATT</b> ACCTTCGTC |

**Figure S2.** Oligonucleotides used for site-directed mutagenesis. To effect the Q34N substitution, the CAG codon CAG codon of Gln34 was replaced with an AAT codon (underlined) of asparagine (reverse complement shown in bold). To effect the Q76N substitution, the CAA codon of Gln76 was replaced with an AAT codon (underlined) of asparagine (reverse complement shown in bold). To effect the Q88N substitution, the CAG codon of Gln88 was replaced with an AAT codon (underlined) of asparagine (reverse complement shown in bold).

|                             |                                                 |
|-----------------------------|-------------------------------------------------|
| NNN ( <i>P. pastoris</i> ): | MRFPSIFTAVLFAASSALAKESRAKKFQRQHMSDSSPSSSSTYCNQ  |
| NNQ ( <i>P. pastoris</i> ): | MRFPSIFTAVLFAASSALAKESRAKKFQRQHMSDSSPSSSSTYCNQ  |
| NQN ( <i>P. pastoris</i> ): | MRFPSIFTAVLFAASSALAKESRAKKFQRQHMSDSSPSSSSTYCNQ  |
| QNN ( <i>P. pastoris</i> ): | MRFPSIFTAVLFAASSALAKESRAKKFQRQHMSDSSPSSSSTYCNQ  |
| NQQ ( <i>P. pastoris</i> ): | MRFPSIFTAVLFAASSALAKESRAKKFQRQHMSDSSPSSSSTYCNQ  |
| QNQ ( <i>P. pastoris</i> ): | MRFPSIFTAVLFAASSALAKESRAKKFQRQHMSDSSPSSSSTYCNQ  |
| QQN ( <i>P. pastoris</i> ): | MRFPSIFTAVLFAASSALAKESRAKKFQRQHMSDSSPSSSSTYCNQ  |
| QQQ ( <i>P. pastoris</i> ): | MRFPSIFTAVLFAASSALAKESRAKKFQRQHMSDSSPSSSSTYCNQ  |
| NNN ( <i>E. coli</i> ):     | MKESRAKKFQRQHMSDSSPSSSSTYCNQ                    |
| QQQ ( <i>E. coli</i> ):     | MKESRAKKFQRQHMSDSSPSSSSTYCNQ                    |
|                             |                                                 |
| NNN ( <i>P. pastoris</i> ): | MMRRRNMTQGRCKPVNTFVHEPLVDVQNVCFQEKVTCKNGQGNCYKS |
| NNQ ( <i>P. pastoris</i> ): | MMRRRNMTQGRCKPVNTFVHEPLVDVQNVCFQEKVTCKNGQGNCYKS |
| NQN ( <i>P. pastoris</i> ): | MMRRRNMTQGRCKPVNTFVHEPLVDVQNVCFQEKVTCKNGQGNCYKS |
| QNN ( <i>P. pastoris</i> ): | MMRRRQMTQGRCKPVNTFVHEPLVDVQNVCFQEKVTCKNGQGNCYKS |
| NQQ ( <i>P. pastoris</i> ): | MMRRRNMTQGRCKPVNTFVHEPLVDVQNVCFQEKVTCKNGQGNCYKS |
| QNQ ( <i>P. pastoris</i> ): | MMRRRQMTQGRCKPVNTFVHEPLVDVQNVCFQEKVTCKNGQGNCYKS |
| QQN ( <i>P. pastoris</i> ): | MMRRRQMTQGRCKPVNTFVHEPLVDVQNVCFQEKVTCKNGQGNCYKS |
| QQQ ( <i>P. pastoris</i> ): | MMRRRQMTQGRCKPVNTFVHEPLVDVQNVCFQEKVTCKNGQGNCYKS |
| NNN ( <i>E. coli</i> ):     | MMRRRNMTQGRCKPVNTFVHEPLVDVQNVCFQEKVTCKNGQGNCYKS |
| QQQ ( <i>E. coli</i> ):     | MMRRRQMTQGRCKPVNTFVHEPLVDVQNVCFQEKVTCKNGQGNCYKS |
|                             |                                                 |
| NNN ( <i>P. pastoris</i> ): | NSSMHITDCRLTNGSRYPNCAVRTSPKERHIIVACEGSPYVPVHFDA |
| NNQ ( <i>P. pastoris</i> ): | NSSMHITDCRLTQGSRYPNCAVRTSPKERHIIVACEGSPYVPVHFDA |
| NQN ( <i>P. pastoris</i> ): | QSSMHITDCRLTNGSRYPNCAVRTSPKERHIIVACEGSPYVPVHFDA |
| QNN ( <i>P. pastoris</i> ): | NSSMHITDCRLTNGSRYPNCAVRTSPKERHIIVACEGSPYVPVHFDA |
| NQQ ( <i>P. pastoris</i> ): | QSSMHITDCRLTQGSRYPNCAVRTSPKERHIIVACEGSPYVPVHFDA |
| QNQ ( <i>P. pastoris</i> ): | NSSMHITDCRLTQGSRYPNCAVRTSPKERHIIVACEGSPYVPVHFDA |
| QQN ( <i>P. pastoris</i> ): | QSSMHITDCRLTNGSRYPNCAVRTSPKERHIIVACEGSPYVPVHFDA |
| QQQ ( <i>P. pastoris</i> ): | QSSMHITDCRLTQGSRYPNCAVRTSPKERHIIVACEGSPYVPVHFDA |
| NNN ( <i>E. coli</i> ):     | NSSMHITDCRLTNGSRYPNCAVRTSPKERHIIVACEGSPYVPVHFDA |
| QQQ ( <i>E. coli</i> ):     | QSSMHITDCRLTQGSRYPNCAVRTSPKERHIIVACEGSPYVPVHFDA |
|                             |                                                 |
| NNN ( <i>P. pastoris</i> ): | SVEDST                                          |
| NNQ ( <i>P. pastoris</i> ): | SVEDST                                          |
| NQN ( <i>P. pastoris</i> ): | SVEDST                                          |
| QNN ( <i>P. pastoris</i> ): | SVEDST                                          |
| NQQ ( <i>P. pastoris</i> ): | SVEDST                                          |
| QNQ ( <i>P. pastoris</i> ): | SVEDST                                          |
| QQN ( <i>P. pastoris</i> ): | SVEDST                                          |
| QQQ ( <i>P. pastoris</i> ): | SVEDST                                          |
| NNN ( <i>E. coli</i> ):     | SVEDST                                          |
| QQQ ( <i>E. coli</i> ):     | SVEDST                                          |

**Figure S3.** Amino acid sequences of the proteins used in this work. Leader sequences are in a gray box. Asparagine-to-glutamine substitutions are indicated in red typeface.

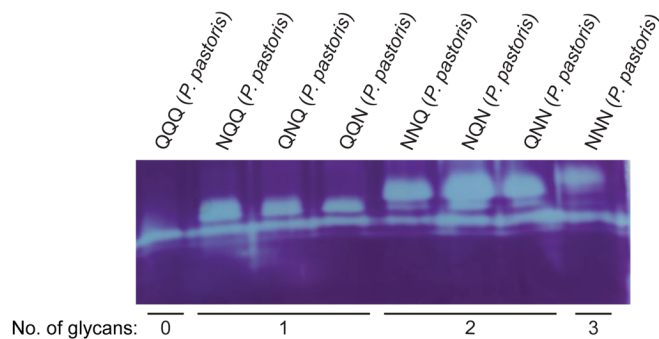

**Figure S4.** Zymogram of human RNase 1 glycoforms. Conditioned medium from *P. pastoris* cultures were evaluated for ribonucleolytic activity. Macroheterogeneity was observable in *N*-glycosylated samples as additional bands.

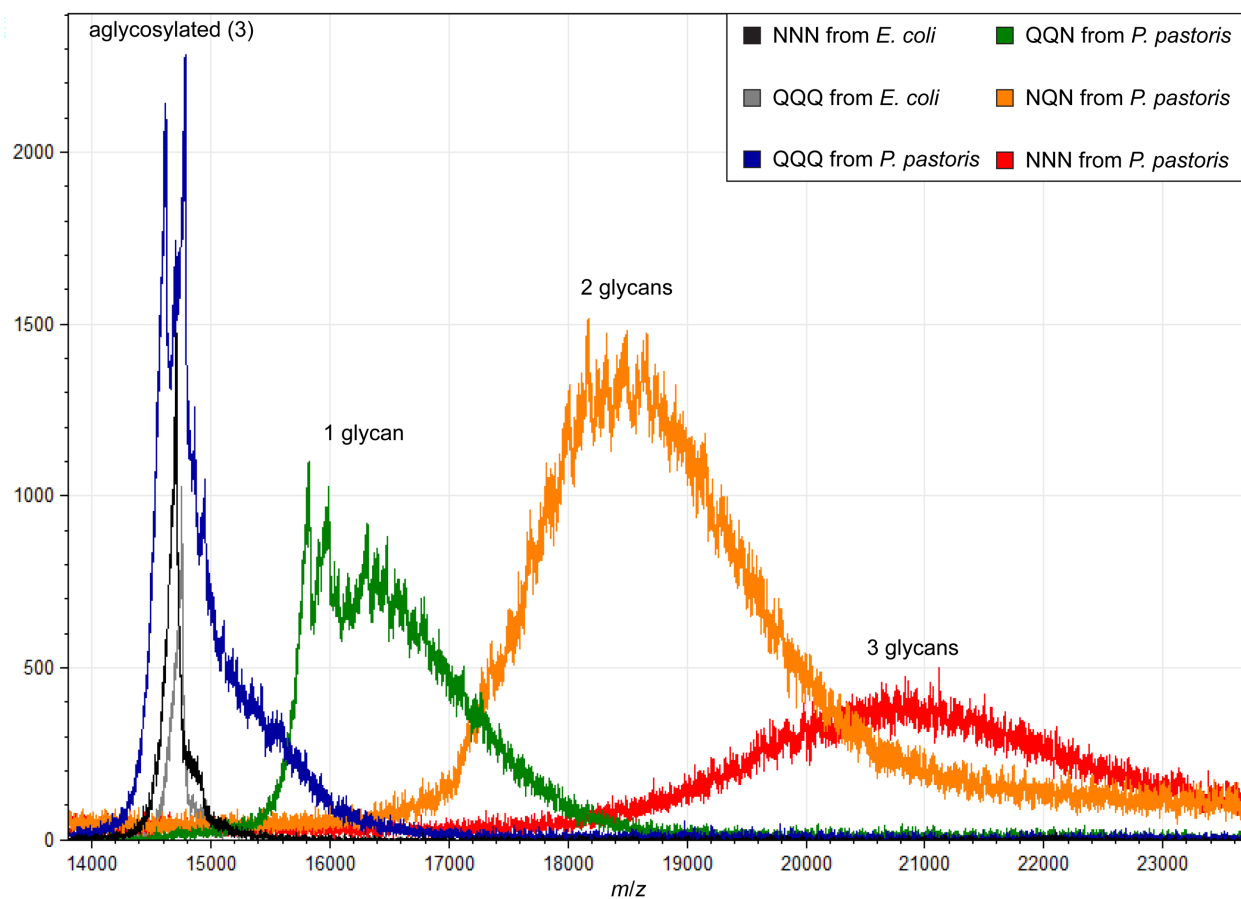

**Figure S5.** Representative MALDI-TOF mass spectra of human RNase 1 glycoforms.

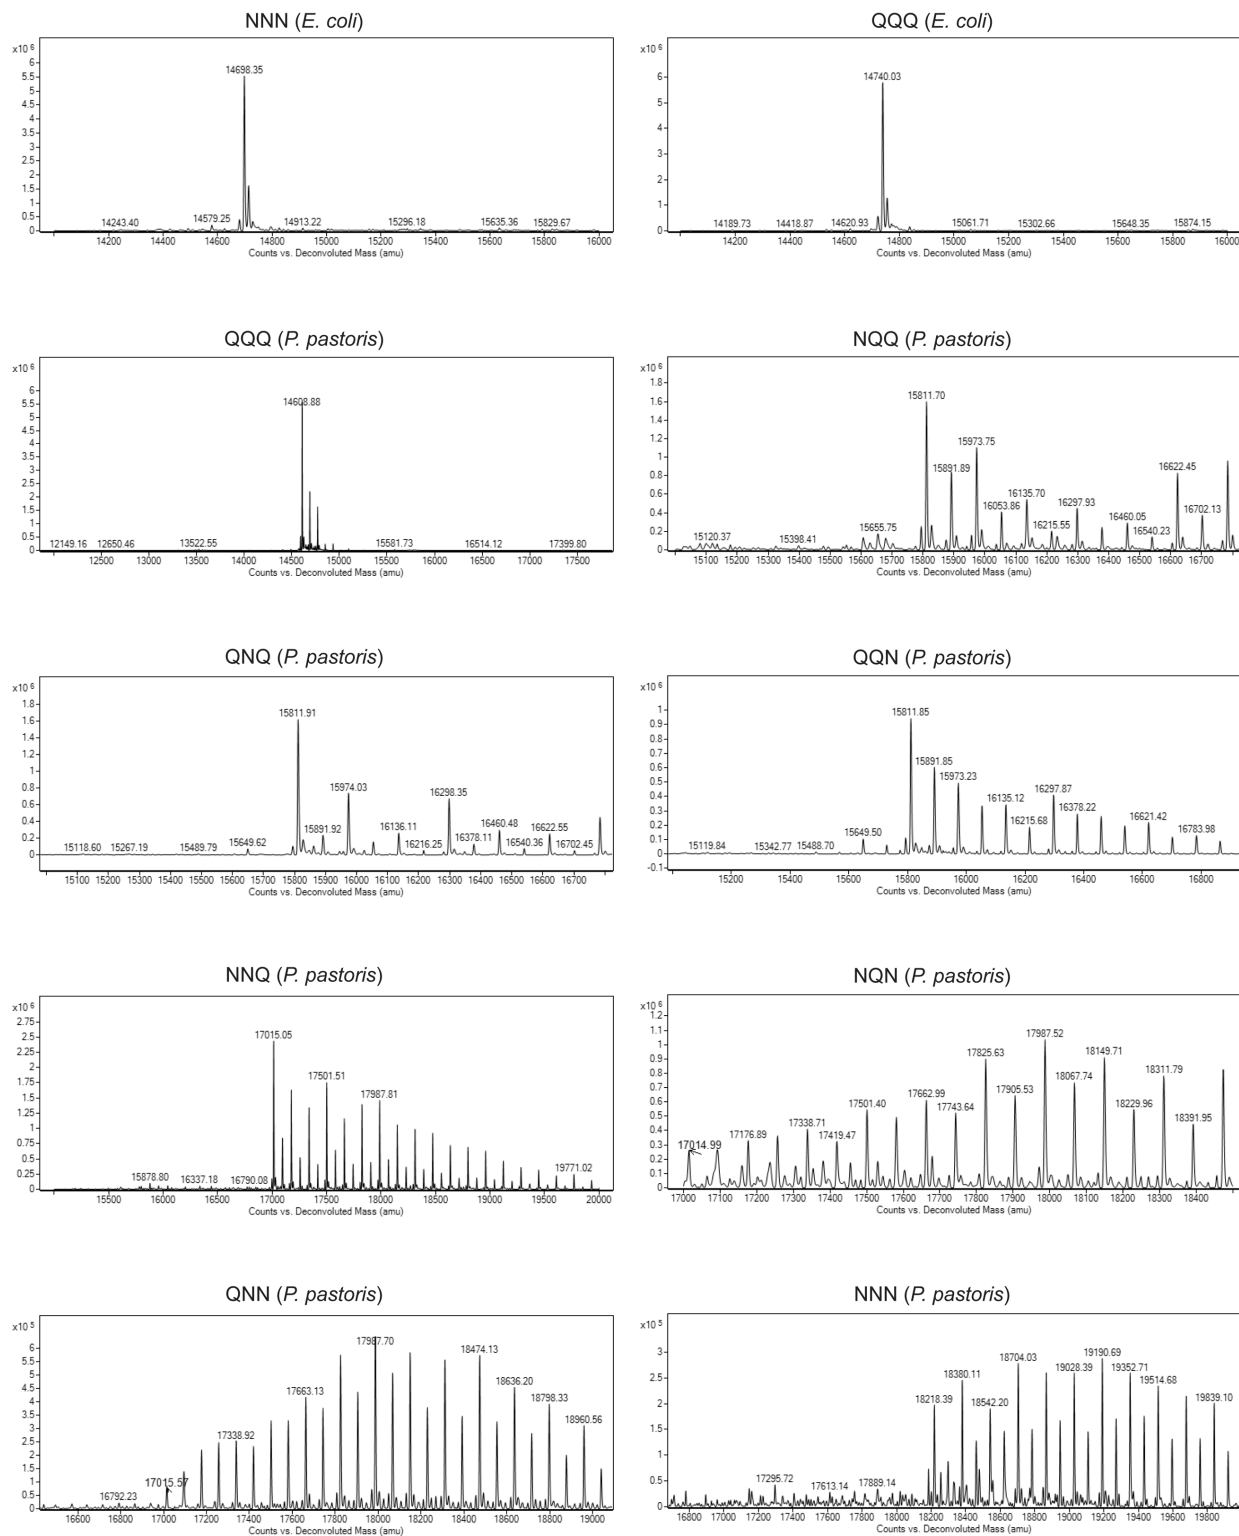

**Figure S6.** Deconvoluted ESI mass spectra of human RNase 1 glycoforms. Each D-mannose unit has a mass of 162.05 Da. The mass of the lightest glycoform is listed in Table 1.

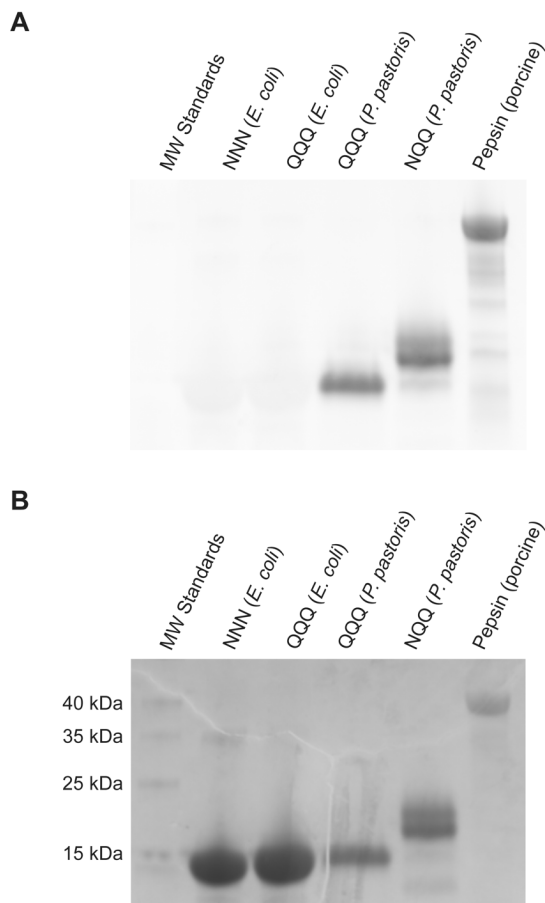

**Figure S7.** SDS-PAGE gels showing the phosphorylation of human RNase 1 by *P. pastoris*. Representative RNase 1 glycoforms as well as a phosphorylated pepsin standard were subjected to electrophoresis in a polyacrylamide gel (15% w/v) and visualized by staining for either phosphorylated proteins with Pro-Q™ Diamond phosphoprotein gel stain (A) or total protein with Coomassie blue (B).



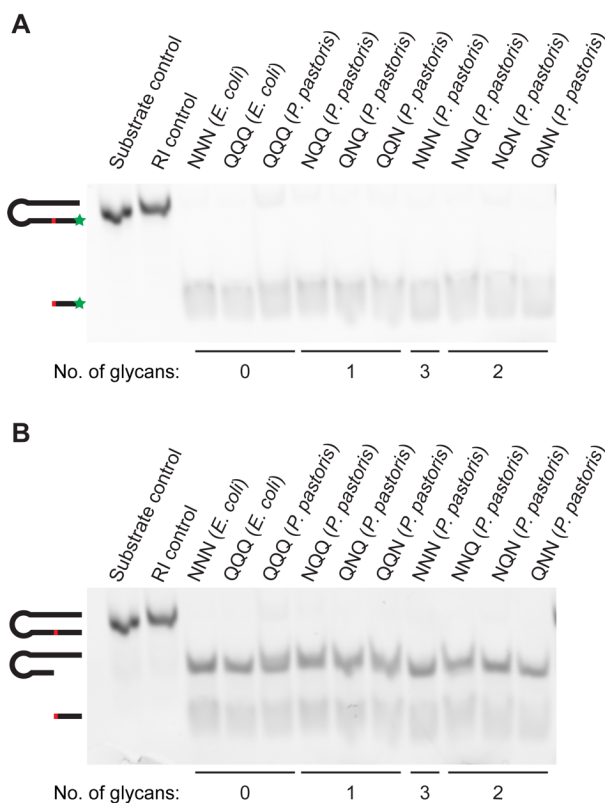

**Figure S8.** Native gel showing cleavage of a double-stranded RNA by RNase 1 glycoforms. The substrate is a DNA hairpin containing a single RNA residue (red) and a fluorophore (green) at its 5' end. The gel was visualized for fluorescence (A) and for total nucleic acids with SYBR Gold (B).

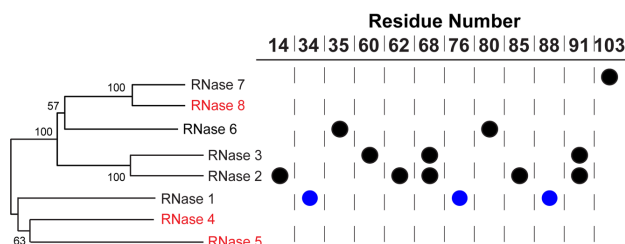

**Figure S9.** Putative *N*-glycosylation sites in human ptRNases 1–8. Circles indicate an asparagine residue within an *N*-glycosylation sequon. The neighbor-joining phylogenetic tree is adapted from ref. 1 and shows bootstrap values >50. The sequon positions are adapted from ref. 2 and are aligned with the sequence for human RNase 1.

## REFERENCES

(1) Zhang, J., Dyer, K. D., and Rosenberg, H. F. (2002) RNase 8, a novel RNase A superfamily ribonuclease expressed uniquely in placenta, *Nucleic Acids Res.* *30*, 1169–1175.

(2) Sorrentino, S. (2010) The eight human “canonical” ribonucleases: Molecular diversity, catalytic properties, and special biological actions of the enzyme proteins, *FEBS Lett.* *584*, 2194–2200.
